# Supplementary material for: Random forest algorithms for recognizing daily life activities using plantar pressure information: a smart-shoe study
Source: PeerJ. 2020 Oct 28;8:e10170. doi: 10.7717/peerj.10170 (PMC7602692; doi:10.7717/peerj.10170)
Supplement: Supplemental Information 2 [file peerj-08-10170-s002.xlsx]

## Sheet: Supplementary 1
	Number of sensors	Using the maximal number of available features				Using 20 features				Using the number of features with the best average performance				Configurations included in the main paper depending on analysis
Sensor configuration		Number of features	minimum	mean	maximum	Number of features	minimum	mean	maximum	Number of features	minimum	mean	maximum	Window length	Sensor locations	Number of features
5	1	29	0.653205	0.783647	0.855517	20	0.677349	0.795652	0.853765	11	0.779192	0.814452	0.841944		1
3	1	29	0.700176	0.755706	0.792032	20	0.713345	0.757595	0.787066	14	0.726076	0.765859	0.799824
6	1	29	0.457419	0.725025	0.817422	20	0.572432	0.75107	0.818742	10	0.647059	0.760434	0.807303
7	1	29	0.735294	0.757272	0.798764	20	0.733099	0.763056	0.800088	17	0.74144	0.769446	0.801412
4	1	29	0.757223	0.792119	0.829685	20	0.75231	0.78801	0.813485	23	0.761109	0.792409	0.82049
2	1	29	0.751536	0.796064	0.837861	20	0.751536	0.794752	0.83743	15	0.763019	0.807458	0.851229
1	1	29	0.722418	0.794074	0.846898	20	0.721977	0.784342	0.83238	28	0.72286	0.794641	0.846458		1	1
1-2	2	51	0.807287	0.850036	0.878284	20	0.769096	0.834438	0.866025	51	0.807287	0.850036	0.878284
1-4	2	54	0.84065	0.868918	0.889667	20	0.813433	0.854137	0.876876	53	0.841967	0.869923	0.894046		1	1
1-7	2	54	0.803775	0.840925	0.886165	20	0.771291	0.815638	0.86296	37	0.802458	0.843651	0.886602
1-6	2	54	0.721686	0.845561	0.900132	20	0.726076	0.840139	0.884294	50	0.735294	0.847689	0.894413
1-3	2	51	0.793679	0.833674	0.868651	20	0.756365	0.813943	0.847338	49	0.796752	0.834154	0.871716
4-6	2	54	0.719052	0.818521	0.866726	20	0.756804	0.815045	0.846425	18	0.801141	0.825144	0.85128		1
5-6	2	51	0.64662	0.796855	0.85289	20	0.720369	0.812533	0.862522	19	0.718613	0.816737	0.859895
4-5	2	51	0.790606	0.841488	0.873468	20	0.763828	0.845436	0.868932	15	0.830992	0.84791	0.866726
5-7	2	51	0.664618	0.796765	0.866025	20	0.716418	0.820647	0.870841	20	0.716418	0.820647	0.870841		1
3-5	2	51	0.751103	0.810081	0.86296	20	0.762511	0.825587	0.859853	20	0.762511	0.825587	0.859853
2-5	2	51	0.781826	0.845836	0.886494	20	0.815189	0.86156	0.881349	14	0.837158	0.866569	0.887182
1-5	2	54	0.818262	0.86809	0.905867	20	0.779192	0.855634	0.902364	29	0.801141	0.870696	0.909807		1
1-5-6	3	76	0.781826	0.865339	0.911121	20	0.802019	0.861551	0.897986	24	0.80597	0.873852	0.910245
1-4-5	3	76	0.824407	0.879406	0.909371	20	0.846795	0.885923	0.903354	19	0.854258	0.886407	0.906425		1
1-4-6	3	79	0.787533	0.868649	0.901452	20	0.777436	0.847078	0.875993	77	0.782265	0.869839	0.898424
4-6-7	3	76	0.726514	0.832307	0.884378	20	0.785338	0.826478	0.862754	73	0.729148	0.834365	0.884378		1
1-3-5	3	76	0.812994	0.87027	0.91465	20	0.841089	0.87111	0.904092	21	0.838016	0.877512	0.908051
3-5-7	3	73	0.75856	0.818031	0.86296	20	0.730904	0.826169	0.861646	24	0.737928	0.831704	0.858991		1
1-2-5	3	76	0.838923	0.879488	0.922129	20	0.837138	0.870907	0.895293	34	0.833187	0.884095	0.91377		1	1
3-5-6	3	73	0.740123	0.817148	0.86296	20	0.708077	0.822273	0.856404	28	0.708516	0.828985	0.861646
2-4-5	3	73	0.80597	0.862888	0.888354	20	0.859853	0.87543	0.889573	33	0.86143	0.876178	0.893973
2-4-6	3	76	0.707199	0.844364	0.877408	20	0.834843	0.856611	0.870841	23	0.843036	0.860368	0.876434
2-5-6	3	76	0.708077	0.840486	0.891419	20	0.751097	0.843419	0.878199	24	0.753292	0.856076	0.884433
1-2-3	3	73	0.812886	0.852526	0.882662	20	0.801141	0.848667	0.879597	72	0.817741	0.853757	0.882224
2-3-5	3	73	0.790167	0.853052	0.890543	20	0.838539	0.865075	0.885289	27	0.838923	0.871394	0.887478
1-4-6-7	4	101	0.790606	0.876241	0.910245	20	0.790606	0.860449	0.885702	66	0.828358	0.880776	0.907618
1-5-6-7	4	98	0.78885	0.865924	0.916375	20	0.812994	0.873743	0.908932	30	0.814311	0.876678	0.913748
1-4-5-7	4	98	0.838455	0.877302	0.913748	20	0.845478	0.88016	0.900613	79	0.837138	0.881712	0.913748
1-4-5-6	4	101	0.801141	0.879483	0.910245	20	0.839333	0.881263	0.903652	24	0.848551	0.88675	0.911131		1
1-3-5-7	4	98	0.825285	0.867491	0.908494	20	0.802019	0.864105	0.900175	75	0.816067	0.869251	0.908494
3-5-6-7	4	95	0.740562	0.821946	0.872592	20	0.713784	0.823802	0.864273	48	0.777436	0.831356	0.869965
3-4-5-7	4	95	0.809482	0.849944	0.881349	20	0.780509	0.830598	0.860106	48	0.797191	0.853842	0.883495
3-4-6-7	4	98	0.739684	0.838498	0.885702	20	0.809482	0.830907	0.854369	92	0.751975	0.841332	0.882171		1
2-4-6-7	4	98	0.738806	0.845335	0.888354	20	0.778314	0.840786	0.866462	28	0.802897	0.854815	0.877317
2-5-6-7	4	98	0.698859	0.842549	0.897986	20	0.720808	0.834659	0.87279	35	0.756804	0.861433	0.890543
2-4-5-7	4	95	0.794996	0.861614	0.893608	20	0.841089	0.868298	0.889667	32	0.847234	0.872439	0.888354
2-4-5-6	4	98	0.776997	0.859878	0.889229	20	0.828358	0.865588	0.881289	35	0.813872	0.869239	0.893204
1-2-3-5	4	98	0.824846	0.880311	0.922129	20	0.828797	0.870804	0.889133	43	0.837138	0.882239	0.911571
1-2-3-6	4	101	0.769096	0.864415	0.898372	20	0.838923	0.857142	0.875935	69	0.81036	0.868872	0.896673
1-2-3-4	4	98	0.85777	0.878313	0.899252	20	0.836717	0.864469	0.878396	97	0.846356	0.879531	0.901926
1-2-4-7	4	98	0.851229	0.879031	0.900175	20	0.834069	0.85989	0.883975	84	0.853928	0.879437	0.901012		1
1-2-4-5	4	98	0.845478	0.885381	0.91641	20	0.861871	0.890774	0.91509	22	0.870256	0.895088	0.91993		1	1
1-3-6-7	4	98	0.777436	0.860184	0.901926	20	0.793679	0.854706	0.886602	56	0.812994	0.871205	0.908932
1-4-5-6-7	5	123	0.812994	0.878888	0.912434	20	0.842406	0.880685	0.900613	35	0.857899	0.885051	0.907171		1
1-2-4-5-6	5	123	0.832309	0.881877	0.912011	20	0.855693	0.884985	0.904302	32	0.869373	0.895126	0.914838		1
1-2-3-4-5	5	120	0.848112	0.889196	0.91905	20	0.869183	0.888529	0.909875	21	0.87511	0.893205	0.912462		1	1
1-2-3-5-6	5	123	0.816945	0.881209	0.91905	20	0.839806	0.873538	0.890543	35	0.858782	0.8903	0.91289
1-2-3-4-7	5	120	0.857266	0.881545	0.908051	20	0.835834	0.861227	0.884413	106	0.852954	0.882407	0.902802
1-2-4-6-7	5	123	0.798507	0.880296	0.909371	20	0.79324	0.854028	0.881414	76	0.844162	0.883079	0.904991		1
2-4-5-6-7	5	120	0.770413	0.858229	0.896235	20	0.802019	0.857513	0.885727	60	0.818701	0.867362	0.896673		1
2-3-4-6-7	5	120	0.763828	0.857192	0.887916	20	0.815628	0.852217	0.873652	44	0.84065	0.866107	0.890115
3-4-5-6-7	5	120	0.783143	0.851257	0.883975	20	0.723003	0.834948	0.862754	35	0.808165	0.857534	0.880406		1
1-2-3-4-6-7	6	145	0.832309	0.882616	0.908494	20	0.832748	0.872968	0.897801	58	0.864078	0.888003	0.905851
1-2-4-5-6-7	6	145	0.812116	0.881734	0.914186	20	0.855252	0.884857	0.90324	47	0.864078	0.889468	0.91509
1-2-3-4-5-7	6	142	0.829236	0.887341	0.912011	20	0.859965	0.885592	0.908931	43	0.868049	0.892023	0.91993		1	1
1-2-3-4-5-6	6	145	0.81914	0.88671	0.91729	20	0.849515	0.880865	0.906497	35	0.867167	0.896161	0.91817		1
1-2-3-5-6-7	6	145	0.800263	0.877452	0.918126	20	0.837138	0.871593	0.89711	45	0.859965	0.890005	0.914186
1-3-4-5-6-7	6	145	0.819579	0.881881	0.911559	20	0.837138	0.879756	0.903678	89	0.843284	0.888815	0.91289		1
2-3-4-5-6-7	6	142	0.791923	0.864988	0.896673	20	0.795435	0.852478	0.87969	58	0.820457	0.87123	0.894969		1
1-2-3-4-5-6-7	7	167	0.816067	0.886387	0.914186	20	0.859087	0.886525	0.905867	80	0.861871	0.894775	0.922129	1	1	1
												0.760434
												0.896161
